# Supplementary material for: Protective Effect of Breastfeeding on the Adverse Health Effects Induced by Air Pollution: Current Evidence and Possible Mechanisms
Source: MDPI journal article supplement (doi:10.3390/ijerph16214181), 2019-10-29
Supplement: s1 [file s1]

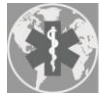

# Protective Effect of Breastfeeding on the Adverse Health Effects Induced by Air Pollution: Current Evidence and Possible Mechanisms

Monika A. Zielinska <sup>1\*</sup> and Jadwiga Hamulka <sup>1</sup>

**Table S1.** Characteristics of studies investigating the influence of breastfeeding on health effects induced by indoor air pollution exposure in the first 1,000 days of life.

| Study                                                               | Air pollutants                                                 |                               |                                                                                                 | Breastfeeding         |                                                           | Main Outcome                       |                              |                                                                      | Data analysis                                                                                                                                                              |
|---------------------------------------------------------------------|----------------------------------------------------------------|-------------------------------|-------------------------------------------------------------------------------------------------|-----------------------|-----------------------------------------------------------|------------------------------------|------------------------------|----------------------------------------------------------------------|----------------------------------------------------------------------------------------------------------------------------------------------------------------------------|
|                                                                     | Type                                                           | Exposure                      | Measurement                                                                                     | Definition            | Data collecting                                           | Type                               | Age                          | Measurement                                                          |                                                                                                                                                                            |
| CS<br>(AMICS)<br>UK and Spain<br><i>n</i> = 1611<br>[57]            | • NO <sub>2</sub>                                              | 2 weeks at<br>age 3<br>months | Passive diffusion tubes<br>used for<br>measurements in<br>living room,<br>colorimetric reaction | Duration of<br>any BF | Questionnaire<br>(duration of any<br>BF)                  | Doctor-diagno<br>sed LRI           | 1 <sup>st</sup> year of life | Questionnaire<br>and examination<br>of clinical<br>records           | Logistic regression analysis used<br>to assess the association between<br>AP exposure and LRI infections<br>adjusted on BF duration                                        |
| CS<br>(Teplice Program)<br>Czech Republic<br><i>n</i> = 452<br>[58] | • AP from<br>coal fuels<br>and<br>smoking                      | Prenatal<br>period            | Questionnaire (indoor<br>heating and cooking<br>fuel sources)                                   | Ever or<br>never BF   | Questionnaire<br>(duration of<br>exclusive and any<br>BF) | Doctor-diagno<br>sed LRI           | 3 years of life              | Examination of<br>clinical records                                   | Generalized estimating equations<br>used to investigate the associations<br>between LRI and coal heating or<br>maternal smoking separately in<br>ever or never BF children |
| CC CSS<br>Study<br>China<br><i>n</i> = 360<br>[38]                  | • PM <sub>1</sub><br>• PM <sub>2.5</sub><br>• PM <sub>10</sub> | 2 months<br>previous          | Handheld particle<br>counter used for<br>measurements in<br>living room and<br>bedroom          | Ever or<br>never BF   | questionnaire                                             | Serum<br>miR-155<br>concentrations | Average 10<br>years          | Analysis by<br>real-time PCR in<br>asthmatic and<br>healthy children | Logistic regression analysis used<br>to assess the associations between<br>AP and the risk of asthma and<br>serum miR-155 level. BF was one<br>of the predictors.          |

Table S1. Cont.

| Study                                                                  | Air pollutants            |                    |                                                                          | Breastfeeding              |                 | Main Outcome            |                         |                                           | Data analysis                                                                                                                              |
|------------------------------------------------------------------------|---------------------------|--------------------|--------------------------------------------------------------------------|----------------------------|-----------------|-------------------------|-------------------------|-------------------------------------------|--------------------------------------------------------------------------------------------------------------------------------------------|
|                                                                        | Type                      | Exposure           | Measurement                                                              | Definition                 | Data collecting | Type                    | Age                     | Measurement                               |                                                                                                                                            |
| CS<br>(INMA)<br>Spain<br><i>n</i> = 1887<br>[71]                       | • AP from<br>gas cooking  | Prenatal<br>period | Questionnaire<br>(cooking fuel sources)                                  | Any BF <6 or<br>≥ 6 months | questionnaire   | Mental<br>development   | 11–22 months<br>of life | Bayley Scales of<br>Infant<br>Development | Linear regression used to examine<br>the association between gas<br>cooking and mental development<br>score. BF was one of the predictors. |
| CSS (NDHS)<br>Nigeria<br><i>n</i> = 38,522<br>[79]                     | • AP from<br>solid fuels  | Postnatal          | Face-to-face interview<br>(cooking fuel sources<br>and kitchen location) | Currently BF               | questionnaire   | Under-five<br>mortality | 0–59 months             | Self-reported by<br>mother                | Cox proportional hazards<br>regression analysis used to<br>examine the effect of several<br>predictors (incl. BF) on mortality             |
| CSS (DHS)<br>23 Sub-Saharan<br>countries<br><i>n</i> = 783,691<br>[80] | • AP from<br>cooking fuel | Postnatal          | Face-to-face interview<br>(cooking fuel sources<br>and kitchen location) | Currently BF               | questionnaire   | Under-five<br>mortality | 0–59 months             | Self-reported by<br>mother                | Cox proportional hazards<br>regression analysis used to<br>examine the effect of several<br>predictors (incl. BF) on mortality             |
| CSS (PDHS)<br>Pakistan<br><i>n</i> = 11,507<br>[81]                    | • AP from<br>cooking fuel | Postnatal          | Face-to-face interview<br>(cooking fuel sources<br>and kitchen location) | Ever or<br>never BF        | questionnaire   | Under-five<br>mortality | 0–59 months             | Slf-reported by<br>mother                 | Logistic regression analysis used<br>to assess the effect of several<br>predictors (incl. BF) on the risk of<br>mortality                  |

AMICS – Asthma Multicentre Infant Cohort Study; AP – air pollution; BF – breastfeeding; CC – case-control; CS – cohort study; CSS – cross-sectional study; DHS – Demographic and Health Survey; INMA – Infancia y Medio Ambiente, the Spanish for Childhood and Environment study; LRI –lower respiratory tract infections; NDHS – Nigeria Demographic and Health Survey; PDHS – Pakistan Demographic and Health Survey; UK – United Kingdom.

**Table S2.** Characteristics of studies investigating the influence of breastfeeding on health effects induced by outdoor air pollution exposure in the first 1,000 days of life.

| Design                                             | Air pollutants                                                                                                                                   |                   |                                                   | Breastfeeding                   |                     | Main Outcome                              |                                 |                                                        | Data analysis                                                                                                                                                                       |
|----------------------------------------------------|--------------------------------------------------------------------------------------------------------------------------------------------------|-------------------|---------------------------------------------------|---------------------------------|---------------------|-------------------------------------------|---------------------------------|--------------------------------------------------------|-------------------------------------------------------------------------------------------------------------------------------------------------------------------------------------|
|                                                    | Type                                                                                                                                             | Exposure          | Measurement                                       | Definition                      | Data collecting     | Type                                      | Age                             | Measurement                                            |                                                                                                                                                                                     |
| CSS (SNECCS)<br>China<br><i>n</i> = 31,049<br>[11] | <ul style="list-style-type: none"> <li>• PM<sub>10</sub></li> <li>• SO<sub>2</sub></li> <li>• NO<sub>2</sub></li> <li>• O<sub>3</sub></li> </ul> | Previous 3 years  | Calculated based on data from monitoring stations | Mainly BF for at least 3 months | Questionnaire       | Respiratory conditions                    | 2–14 years (previous 12 months) | Questionnaire                                          | Logistic regression analysis used to examine the effect of AP exposure separately in ≥ 3 mo and ≤ 3 mo BF children                                                                  |
| CS<br>(BILD) Switzerland<br><i>n</i> = 436<br>[83] | <ul style="list-style-type: none"> <li>• PM<sub>10</sub></li> </ul>                                                                              | Lifetime exposure | Calculated based on data from monitoring stations | Duration of any BF              | Telephone interview | Respiratory symptoms                      | First 27 weeks of life          | Telephone interview using a standardized symptom score | Generalized additive mixed model used to examine the association between AP exposure, several predictors (incl. BF) and respiratory symptoms also separately in BF and NBF children |
| CSS (CCHH) China<br><i>n</i> = 30,759<br>[63]      | <ul style="list-style-type: none"> <li>• PM<sub>2.5</sub> (at kindergarten)</li> </ul>                                                           | Previous 1 years  | Calculated based on GDP data                      | Any BF ≤ 6 or > 6 months        | Questionnaire       | Asthmatic and allergic symptoms           | 4.6 years (previous 12 months)  | Questionnaire                                          | Logistic regression analysis used to examine the association between AP exposure and symptoms. BF was one of predictors.                                                            |
| CSS<br>China<br><i>n</i> = 39,782<br>[64]          | <ul style="list-style-type: none"> <li>• PM<sub>10</sub></li> <li>• NO<sub>2</sub></li> <li>• SO<sub>2</sub></li> </ul>                          | Lifetime exposure | Calculated based on annual data for each city     | Ever or never BF                | Questionnaire       | Asthma, rhinitis and respiratory symptoms | 3–6 years                       | Questionnaire                                          | Logistic regression analysis used to examine the association between AP exposure and symptoms. BF was one of the predictors.                                                        |

Table S2. Cont.

| Design                                                        | Air pollutants                                                                                                                                                 |                  |                                                   | Breastfeeding                      |                        | Main Outcome       |                      |                                                  | Data analysis                                                                                                                                          |
|---------------------------------------------------------------|----------------------------------------------------------------------------------------------------------------------------------------------------------------|------------------|---------------------------------------------------|------------------------------------|------------------------|--------------------|----------------------|--------------------------------------------------|--------------------------------------------------------------------------------------------------------------------------------------------------------|
|                                                               | Type                                                                                                                                                           | Exposure         | Measurement                                       | Definition                         | Data collecting        | Type               | Age                  | Measurement                                      |                                                                                                                                                        |
| CSS (SNECCS)<br>China<br><i>n</i> = 6740<br>[13]              | <ul style="list-style-type: none"> <li>• PM<sub>1</sub></li> <li>• PM<sub>2.5</sub></li> <li>• PM<sub>10</sub></li> <li>• NO<sub>2</sub></li> </ul>            | Previous 4 years | Calculated based on data from monitoring stations | Mainly BF for at least 3 months    | Questionnaire          | Lung function      | 7–14 years           | Spirometry                                       | Logistic regression analysis used to examine the association between AP exposure and lung function separately in BF and NBF children                   |
| CSS (SNECCS)<br>China<br><i>n</i> = 9354<br>[84]              | <ul style="list-style-type: none"> <li>• PM<sub>10</sub></li> <li>• SO<sub>2</sub></li> <li>• NO<sub>2</sub></li> <li>• O<sub>3</sub></li> <li>• CO</li> </ul> | Previous 4 years | Calculated based on data from monitoring stations | Mainly BF for at least 3 months    | Questionnaire          | Blood pressure     | 5–17 years           | Measurement                                      | Logistic regression analysis used to examine the association between AP exposure and hypertension and blood pressure separately in BF and NBF children |
| Cohort study<br>(INMA)<br>Spain<br><i>n</i> = 1889<br>[72]    | <ul style="list-style-type: none"> <li>• NO<sub>2</sub></li> <li>• benzene</li> </ul>                                                                          | Prenatal period  | Calculated based on data from monitoring stations | Any BF never; <6 or ≥ 6 months     | Face-to-face interview | Mental development | 11–23 months of life | Bayley Scales of Infant Development              | Linear regression used to examine the association between AP exposure and mental development score. BF was one of the predictors.                      |
| CS<br>Poland<br><i>n</i> = 170<br>Jedrychowski et al.<br>[73] | PAHs                                                                                                                                                           | Prenatal         | Exposure measured by cord blood PAH-DNA adducts   | Exclusive BF (EBF; WHO definition) | Face-to-face interview | Mental development | 7 years              | Wechsler Intelligence Scale for Children-Revised | Binary regression used to examine the association between PAH-DNA adducts and verbal IQ score. BF was one of the predictors.                           |

Table S2. Cont.

| Design                                           | Air pollutants                                                                                                    |                    |                                                            | Breastfeeding                       |                           | Main Outcome                      |                              |                                           | Data analysis                                                                                                                                                 |
|--------------------------------------------------|-------------------------------------------------------------------------------------------------------------------|--------------------|------------------------------------------------------------|-------------------------------------|---------------------------|-----------------------------------|------------------------------|-------------------------------------------|---------------------------------------------------------------------------------------------------------------------------------------------------------------|
|                                                  | Type                                                                                                              | Exposure           | Measurement                                                | Definition                          | Data collecting           | Type                              | Age                          | Measurement                               |                                                                                                                                                               |
| CS<br>(INMA)<br>Spain<br><i>n</i> = 438<br>[74]  | <ul style="list-style-type: none"> <li>• PM<sub>2.5</sub></li> <li>• NO<sub>2</sub></li> <li>• benzene</li> </ul> | Prenatal           | Calculated<br>based on data<br>from monitoring<br>stations | EBF ≤ 4 or > 4<br>months            | Face-to-face<br>interview | Mental development                | 2 <sup>nd</sup> year of life | Bayley Scales of<br>Infant<br>Development | Linear regression used to<br>examine the association<br>between AP exposure and<br>mental development score.<br>BF was one of the predictors.                 |
| CS<br>(INMA)<br>Spain<br><i>n</i> = 1119<br>[12] | <ul style="list-style-type: none"> <li>• PM<sub>2.5</sub></li> <li>• NO<sub>2</sub></li> </ul>                    | Prenatal<br>period | Calculated<br>based on data<br>from monitoring             | Predominant BF<br>≤ 4 or > 4 months | Face-to-face<br>interview | Neuropsychological<br>development | 4–6 years                    | McCarthy scales                           | Linear regression used to<br>examine the association<br>between AP exposure and<br>mental development score.<br>The analysis was stratified<br>by BF duration |

AP – air pollution; BF – breastfeeding; BILD – Bern-Basel Infant Lung Development; CCHH – China, Children, Homes and Health study; EBF – exclusive breastfeeding; GBD – global burden disease; INMA – Infancia y Medio Ambiente, the Spanish for Childhood and Environment study; IQ – intelligence quotient; NBF – never breastfed; PAHs – polycyclic aromatic hydrocarbons; SNECCS – Seven Northeastern Cities Chinese Children's Study.
